# Supplementary material for: Associations of the COVID-19 pandemic with quality of life: A cross-sectional study of older-age people with and without HIV in rural Uganda
Source: PubMed Central journal article supplement (PMC9850875; doi:10.7189/jogh.13.06003), 2023-01-20
Supplement: jogh-13-06003-s001.pdf [file jogh-13-06003-s001.pdf]

## ONLINE SUPPLEMENTARY DOCUMENT

**Title:** Associations of the COVID-19 pandemic on quality of life: cross-sectional study of older-age people with and without HIV in rural Uganda

**Authors:** Brianne Olivieri-Mui<sup>1</sup>, Susanne S. Hoepfner<sup>2,3</sup>, Yao Tong<sup>2,3</sup>, Emma Kohrt<sup>1</sup>, Lien T. Quach<sup>2,3</sup>, Deanna Saylor<sup>4</sup>, Janet Seeley<sup>5</sup>, Alexander C. Tsai<sup>2,3</sup>, Zahra Reynolds<sup>2</sup>, Samson Okello<sup>6,7</sup>, Stephen Asimwe<sup>2,6,8</sup>, Atwiine Flavia<sup>6</sup>, Ruth Sentongo<sup>6</sup>, Edna Tindimwebwa<sup>8</sup>, Ana-Claire Meyer<sup>4</sup>, Noeline Nakasujja<sup>9</sup>, Robert Paul<sup>10</sup>, Christine Ritchie<sup>2,3</sup>, Meredith Greene<sup>11</sup>, Mark J. Siedner<sup>2,3,6</sup>

**Affiliations:**<sup>1</sup>Northeastern University, <sup>2</sup>Massachusetts General Hospital and University of Massachusetts Boston, <sup>3</sup>Harvard Medical School, <sup>4</sup>Johns Hopkins University School of Medicine, <sup>5</sup>London School of Hygiene & Tropical Medicine, <sup>6</sup>Mbarara University of Science and Technology, <sup>7</sup>University of North Carolina at Chapel Hill, <sup>8</sup>Kabwohe Clinical Research Centre, <sup>9</sup>Makerere University, <sup>10</sup>University of Missouri-St Louis, <sup>11</sup>University of California, San Francisco

**Table S1.** Specific COVID-related behavioral changes made and post hoc analysis of the association of each with quality of life.

|                                                          | All<br>(n=562)<br>n(%) | CASP-19               |                                           |                  | EQ-VAS                |                                           |         |
|----------------------------------------------------------|------------------------|-----------------------|-------------------------------------------|------------------|-----------------------|-------------------------------------------|---------|
|                                                          |                        | Univariate<br>p-value | Adjusted <sup>a</sup><br>Estimate (95%CI) | p-value          | Univariate<br>p-value | Adjusted <sup>a</sup><br>Estimate (95%CI) | p-value |
| Changes made include:                                    |                        |                       |                                           |                  |                       |                                           |         |
| No changes                                               | 0                      | -                     |                                           |                  | -                     |                                           |         |
| Wash hands more often                                    | 533 (95)               | 0.678                 |                                           |                  | 0.918                 |                                           |         |
| using face mask                                          | 520 (93)               | 0.429                 |                                           |                  | 0.606                 |                                           |         |
| Avoided crowded areas                                    | 361 (64)               | 0.501                 |                                           |                  | 0.950                 |                                           |         |
| Avoid social events                                      | 198 (35)               | <b>0.005</b>          | <b>-1.38 (-2.65 – -0.11)</b>              | <b>0.033</b>     | 0.615                 |                                           |         |
| using hand sanitizer                                     | 141 (25)               | <b>0.032</b>          | 0.74 (-0.60 – 2.07)                       | 0.280            | <b>0.000</b>          | 3.79 (0.79 – 6.78)                        | 0.013   |
| avoid taking public transit                              | 111 (20)               | <b>0.000</b>          | <b>-3.16 (-4.70 – -1.62)</b>              | <b>&lt;0.001</b> | <b>0.004</b>          | -2.88 (-6.15 – 0.39)                      | 0.084   |
| avoided hugging                                          | 99 (18)                | 0.056                 |                                           |                  | 0.865                 |                                           |         |
| avoided having children/<br>young adults going to school | 80 (14)                | <b>0.011</b>          | <b>-3.78 (-5.48 – -2.07)</b>              | <b>&lt;0.001</b> | 0.893                 |                                           |         |
| avoided greeting other people                            | 71 (13)                | 0.000                 | -1.68 (-3.40 – 0.03)                      | 0.054            | 0.856                 |                                           |         |
| avoided travelling long<br>distances                     | 69 (12)                | 0.076                 |                                           |                  | 0.278                 |                                           |         |
| avoided touching face                                    | 45 (8)                 | 0.085                 |                                           |                  | 0.058                 |                                           |         |
| avoided going outside                                    | 38 (7)                 | 0.827                 |                                           |                  | 0.070                 |                                           |         |
| avoided people who present<br>symptoms                   | 27 (5)                 | 0.976                 |                                           |                  | 0.507                 |                                           |         |
| Avoided family members/<br>friends                       | 26 (5)                 | 0.032                 |                                           |                  | 0.234                 |                                           |         |
| avoided going to work                                    | 18 (3)                 | 0.079                 |                                           |                  | 0.000                 |                                           |         |
| self-isolation                                           | 15 (3)                 | 0.024                 |                                           |                  | 0.506                 |                                           |         |
| wearing gloves                                           | 7 (1)                  | 0.985                 |                                           |                  | 0.997                 |                                           |         |
| avoided seeking healthcare for<br>preventive care        | 3 (1)                  | 0.723                 |                                           |                  | 0.826                 |                                           |         |
| avoided seeking healthcare for<br>illness                | 2 (0)                  | 0.027                 |                                           |                  | 0.750                 |                                           |         |
| avoided picking up meds for<br>chronic disease           | 0                      | -                     |                                           |                  | -                     |                                           |         |
| living elsewhere                                         | 0                      | -                     |                                           |                  | -                     |                                           |         |
| Other changes                                            | 65 (12)                | 0.891                 |                                           |                  | 0.443                 |                                           |         |

Note: <sup>a</sup>Model adjusted for age, sex, education, water source, job, HIV status, COVID concern, COVID food security, COVID healthcare seeking, COVID income interruption, depression, loneliness, frailty, and COVID wave.

**Table S2.** Univariate associations of independent variables, HIV status, and Wave with the primary and secondary QOL outcomes

|                                  | <i>Primary</i>                             | <i>Secondary</i>                           |
|----------------------------------|--------------------------------------------|--------------------------------------------|
|                                  | <i>CASP-19</i><br><i>Estimate (95% CI)</i> | <i>EQ5-VAS</i><br><i>Estimate (95% CI)</i> |
| COVID behaviors                  |                                            |                                            |
| Total behavior changes           |                                            |                                            |
| 3-4 changes                      | -0.26 (-2.57 – 2.04)                       | -0.22 (-4.59 – 4.15)                       |
| 5+ changes                       | -4.10 (-6.38 – -1.82)                      | -3.08 (-7.41 – 1.26)                       |
| <3 changes                       | ref                                        | ref                                        |
| COVID concern                    |                                            |                                            |
| Somewhat concerned               | -1.35 (-4.38 – 1.67)                       | 2.24 (-3.41 – 7.90)                        |
| Very concerned                   | 0.62 (-2.16 – 3.40)                        | 2.20 (-2.98 – 7.39)                        |
| Not concerned                    | ref                                        | Ref                                        |
| COVID had access to food         | 6.32 (4.38 – 8.26)                         | 5.41 (1.70 – 9.13)                         |
| COVID impacted healthcare access | -1.35 (-3.65 – 0.95)                       | -2.11 (-6.39 – 2.17)                       |
| COVID impacted income            | -0.69 (-2.27 – 0.89)                       | -4.49 (-7.41 – -1.58)                      |
| Mental Health index              | -4.77 (-5.48 – -4.07)                      | -6.41 (-7.82 – -5.01)                      |
| Frailty status                   |                                            |                                            |
| Pre-frail                        | -6.36 (-8.26 – -4.46)                      | -10.31 (-13.88 – -6.75)                    |
| Frail                            | -2.86 (-4.98 – -0.73)                      | -3.81 (-7.80 – 0.18)                       |
| Robust                           | ref                                        | ref                                        |
| COVID wave 2                     | 1.5 (-0.31 – 3.32)                         | 0.62 (-2.76 – 4.00)                        |
| HIV+                             | -0.62 (-2.14 – 0.90)                       | 6.36 (3.58 – 9.13)                         |
